# Supplementary material for: The Interplay of Sleep Quality, Mental Health, and Sociodemographic and Clinical Factors among Italian College Freshmen
Source: MDPI journal article supplement (doi:10.3390/jcm13092626), 2024-04-29
Supplement: s1 [file s1]

**Table S1.** Correlations between outcome variables.

|                                |                        | GHQ-12 total<br>score | USS total<br>score | IAUQ total<br>score | ASSIST alcohol<br>total score | ASSIST cannabis<br>total score |
|--------------------------------|------------------------|-----------------------|--------------------|---------------------|-------------------------------|--------------------------------|
| GHQ-12 total score             | Pearson                | 1                     | .423**             | .267**              | .089*                         | .054                           |
|                                | Sig. (2-tailed)        |                       | <.001              | <.001               | .017                          | .147                           |
|                                | N                      | 721                   | 721                | 721                 | 721                           | 721                            |
| USS total score                | Pearson                | .423**                | 1                  | .427**              | .187**                        | .128**                         |
|                                | Sig. (2-tailed)        | <.001                 |                    | <.001               | <.001                         | <.001                          |
|                                | N                      | 721                   | 721                | 721                 | 721                           | 721                            |
| IAUQ total score               | Pearson                | .267**                | .427**             | 1                   | .174**                        | .091*                          |
|                                | Sig. (2-tailed)        | <.001                 | <.001              |                     | <.001                         | .014                           |
|                                | N                      | 721                   | 721                | 721                 | 721                           | 721                            |
| ASSIST_alcohol total<br>score  | Pearson                | .089*                 | .187**             | .174**              | 1                             | .305**                         |
|                                | Sig. (2-tailed)        | .017                  | <.001              | <.001               |                               | <.001                          |
|                                | N                      | 721                   | 721                | 721                 | 721                           | 721                            |
| ASSIST_cannabis total<br>score | Pearson<br>Correlation | .054                  | .128**             | .091*               | .305**                        | 1                              |
|                                | Sig. (2-tailed)        | .147                  | <.001              | .014                | <.001                         |                                |
|                                | N                      | 721                   | 721                | 721                 | 721                           | 721                            |

\*\* . Correlation is significant at the 0.01 level (2-tailed).

\* . Correlation is significant at the 0.05 level (2-tailed).

**Table S2.** Pairwise correlations\_satisfaction with sleep quality.

| Pairwise Comparisons |                      |                           |                           |                          |            |                   |                                                     |             |
|----------------------|----------------------|---------------------------|---------------------------|--------------------------|------------|-------------------|-----------------------------------------------------|-------------|
| Dependent Variable   | Independent Variable | Sleep satisfaction<br>(I) | Sleep satisfaction<br>(J) | Mean Difference<br>(I-J) | Std. Error | Sig. <sup>1</sup> | 95% Confidence Interval for Difference <sup>1</sup> |             |
|                      |                      |                           |                           |                          |            |                   | Lower Bound                                         | Upper Bound |
| Gender               |                      |                           |                           |                          |            |                   |                                                     |             |
| GHQ total score      | male                 | dissatisfied              | neutral                   | 2.687                    | 1.509      | .226              | -.935                                               | 6.310       |
|                      |                      |                           | satisfied                 | 2.626                    | 1.543      | .268              | -1.077                                              | 6.328       |
|                      |                      | neutral                   | dissatisfied              | -2.687                   | 1.509      | .226              | -6.310                                              | .935        |
|                      |                      |                           | satisfied                 | -.062                    | 1.518      | 1.000             | -3.706                                              | 3.582       |
|                      |                      | satisfied                 | dissatisfied              | -2.626                   | 1.543      | .268              | -6.328                                              | 1.077       |
|                      |                      |                           | neutral                   | .062                     | 1.518      | 1.000             | -3.582                                              | 3.706       |
|                      | female               | dissatisfied              | neutral                   | 3.897*                   | 1.230      | .005              | .944                                                | 6.849       |
|                      |                      |                           | satisfied                 | 2.376                    | 1.327      | .221              | -.809                                               | 5.560       |
|                      |                      | neutral                   | dissatisfied              | -3.897*                  | 1.230      | .005              | -6.849                                              | -.944       |
|                      |                      |                           | satisfied                 | -1.521                   | 1.375      | .808              | -4.822                                              | 1.780       |
|                      |                      | satisfied                 | dissatisfied              | -2.376                   | 1.327      | .221              | -5.560                                              | .809        |
|                      |                      |                           | neutral                   | 1.521                    | 1.375      | .808              | -1.780                                              | 4.822       |
| USS total score      | male                 | dissatisfied              | neutral                   | 4.731                    | 1.978      | .051              | -.017                                               | 9.478       |
|                      |                      |                           | satisfied                 | 4.303                    | 2.022      | .101              | -.550                                               | 9.156       |
|                      |                      | neutral                   | dissatisfied              | -4.731                   | 1.978      | .051              | -9.478                                              | .017        |
|                      |                      |                           | satisfied                 | -.427                    | 1.990      | 1.000             | -5.204                                              | 4.349       |
|                      |                      | satisfied                 | dissatisfied              | -4.303                   | 2.022      | .101              | -9.156                                              | .550        |
|                      |                      |                           | neutral                   | .427                     | 1.990      | 1.000             | -4.349                                              | 5.204       |
|                      | female               | dissatisfied              | neutral                   | 2.781                    | 1.613      | .255              | -1.089                                              | 6.651       |
|                      |                      |                           | satisfied                 | 4.095                    | 1.739      | .056              | -.079                                               | 8.269       |
|                      |                      | neutral                   | dissatisfied              | -2.781                   | 1.613      | .255              | -6.651                                              | 1.089       |
|                      |                      |                           | satisfied                 | 1.314                    | 1.803      | 1.000             | -3.013                                              | 5.641       |
|                      |                      | satisfied                 | dissatisfied              | -4.095                   | 1.739      | .056              | -8.269                                              | .079        |
|                      |                      |                           |                           |                          |            |                   |                                                     |             |

|                             |        |              |              |         |       |       |        |        |
|-----------------------------|--------|--------------|--------------|---------|-------|-------|--------|--------|
| IAUQ total score            | male   | dissatisfied | neutral      | -1.314  | 1.803 | 1.000 | -5.641 | 3.013  |
|                             |        |              | satisfied    | .991    | 2.532 | 1.000 | -5.086 | 7.068  |
|                             |        | neutral      | dissatisfied | .434    | 2.477 | 1.000 | -5.511 | 6.379  |
|                             |        |              | satisfied    | 1.425   | 2.492 | 1.000 | -4.556 | 7.406  |
|                             |        | satisfied    | dissatisfied | -.991   | 2.532 | 1.000 | -7.068 | 5.086  |
|                             |        |              | neutral      | -1.425  | 2.492 | 1.000 | -7.406 | 4.556  |
|                             | female | dissatisfied | neutral      | -.682   | 2.019 | 1.000 | -5.528 | 4.164  |
|                             |        |              | satisfied    | 1.665   | 2.178 | 1.000 | -3.562 | 6.892  |
|                             |        | neutral      | dissatisfied | .682    | 2.019 | 1.000 | -4.164 | 5.528  |
|                             |        |              | satisfied    | 2.347   | 2.257 | .897  | -3.071 | 7.765  |
|                             |        | satisfied    | dissatisfied | -1.665  | 2.178 | 1.000 | -6.892 | 3.562  |
|                             |        |              | neutral      | -2.347  | 2.257 | .897  | -7.765 | 3.071  |
| ASSIST_alcool total score   | male   | dissatisfied | neutral      | 1.766   | 1.341 | .565  | -1.452 | 4.984  |
|                             |        |              | satisfied    | 1.896   | 1.370 | .501  | -1.393 | 5.185  |
|                             |        | neutral      | dissatisfied | -1.766  | 1.341 | .565  | -4.984 | 1.452  |
|                             |        |              | satisfied    | .130    | 1.349 | 1.000 | -3.108 | 3.367  |
|                             |        | satisfied    | dissatisfied | -1.896  | 1.370 | .501  | -5.185 | 1.393  |
|                             |        |              | neutral      | -.130   | 1.349 | 1.000 | -3.367 | 3.108  |
|                             | female | dissatisfied | neutral      | 1.486   | 1.093 | .523  | -1.137 | 4.109  |
|                             |        |              | satisfied    | 1.010   | 1.179 | 1.000 | -1.819 | 3.839  |
|                             |        | neutral      | dissatisfied | -1.486  | 1.093 | .523  | -4.109 | 1.137  |
|                             |        |              | satisfied    | -.476   | 1.222 | 1.000 | -3.408 | 2.457  |
|                             |        | satisfied    | dissatisfied | -1.010  | 1.179 | 1.000 | -3.839 | 1.819  |
|                             |        |              | neutral      | .476    | 1.222 | 1.000 | -2.457 | 3.408  |
| ASSIST_cannabis total score | male   | dissatisfied | neutral      | 3.481*  | .856  | .000  | 1.425  | 5.536  |
|                             |        |              | satisfied    | 3.046*  | .875  | .002  | .946   | 5.147  |
|                             |        | neutral      | dissatisfied | -3.481* | .856  | .000  | -5.536 | -1.425 |
|                             |        |              | satisfied    | -.434   | .862  | 1.000 | -2.502 | 1.633  |
|                             |        | satisfied    | dissatisfied | -3.046* | .875  | .002  | -5.147 | -.946  |
|                             |        |              | neutral      | .434    | .862  | 1.000 | -1.633 | 2.502  |
|                             | female | dissatisfied | neutral      | 2.117*  | .698  | .008  | .441   | 3.792  |
|                             |        |              | satisfied    | 1.345   | .753  | .223  | -.462  | 3.152  |

|                     |                |              |              |         |       |       |        |       |
|---------------------|----------------|--------------|--------------|---------|-------|-------|--------|-------|
|                     |                | neutral      | dissatisfied | -2.117* | .698  | .008  | -3.792 | -.441 |
|                     |                |              | satisfied    | -.772   | .780  | .969  | -2.645 | 1.101 |
|                     |                | satisfied    | dissatisfied | -1.345  | .753  | .223  | -3.152 | .462  |
|                     |                |              | neutral      | .772    | .780  | .969  | -1.101 | 2.645 |
| Relationship status |                |              |              |         |       |       |        |       |
| GHQ total score     | single         | dissatisfied | neutral      | 2.693   | 1.332 | .131  | -.504  | 5.890 |
|                     |                |              | satisfied    | 1.595   | 1.417 | .782  | -1.805 | 4.995 |
|                     |                | neutral      | dissatisfied | -2.693  | 1.332 | .131  | -5.890 | .504  |
|                     |                |              | satisfied    | -1.098  | 1.441 | 1.000 | -4.557 | 2.361 |
|                     |                | satisfied    | dissatisfied | -1.595  | 1.417 | .782  | -4.995 | 1.805 |
|                     |                |              | neutral      | 1.098   | 1.441 | 1.000 | -2.361 | 4.557 |
|                     | with a partner | dissatisfied | neutral      | 3.891*  | 1.377 | .015  | .587   | 7.195 |
|                     |                |              | satisfied    | 3.406*  | 1.412 | .048  | .019   | 6.794 |
|                     |                | neutral      | dissatisfied | -3.891* | 1.377 | .015  | -7.195 | -.587 |
|                     |                |              | satisfied    | -.485   | 1.419 | 1.000 | -3.891 | 2.921 |
|                     |                | satisfied    | dissatisfied | -3.406* | 1.412 | .048  | -6.794 | -.019 |
|                     |                |              | neutral      | .485    | 1.419 | 1.000 | -2.921 | 3.891 |
| USS total score     | single         | dissatisfied | neutral      | 2.850   | 1.746 | .309  | -1.340 | 7.041 |
|                     |                |              | satisfied    | 3.709   | 1.857 | .139  | -.748  | 8.166 |
|                     |                | neutral      | dissatisfied | -2.850  | 1.746 | .309  | -7.041 | 1.340 |
|                     |                |              | satisfied    | .859    | 1.889 | 1.000 | -3.676 | 5.393 |
|                     |                | satisfied    | dissatisfied | -3.709  | 1.857 | .139  | -8.166 | .748  |
|                     |                |              | neutral      | -.859   | 1.889 | 1.000 | -5.393 | 3.676 |
|                     | with a partner | dissatisfied | neutral      | 4.661*  | 1.805 | .030  | .331   | 8.992 |
|                     |                |              | satisfied    | 4.690*  | 1.850 | .034  | .249   | 9.130 |
|                     |                | neutral      | dissatisfied | -4.661* | 1.805 | .030  | -8.992 | -.331 |
|                     |                |              | satisfied    | .028    | 1.860 | 1.000 | -4.436 | 4.492 |
|                     |                | satisfied    | dissatisfied | -4.690* | 1.850 | .034  | -9.130 | -.249 |
|                     |                |              | neutral      | -.028   | 1.860 | 1.000 | -4.492 | 4.436 |
| IAUQ total score    | single         | dissatisfied | neutral      | -.333   | 2.186 | 1.000 | -5.580 | 4.915 |
|                     |                |              | satisfied    | .371    | 2.325 | 1.000 | -5.210 | 5.952 |
|                     |                | neutral      | dissatisfied | .333    | 2.186 | 1.000 | -4.915 | 5.580 |
|                     |                |              | satisfied    | .704    | 2.366 | 1.000 | -4.974 | 6.382 |

|                             |                |              |              |         |       |        |        |        |
|-----------------------------|----------------|--------------|--------------|---------|-------|--------|--------|--------|
| ASSIST_alcool total score   | with a partner | satisfied    | dissatisfied | -371    | 2.325 | 1.000  | -5.952 | 5.210  |
|                             |                |              | neutral      | -.704   | 2.366 | 1.000  | -6.382 | 4.974  |
|                             |                | dissatisfied | neutral      | -.784   | 2.260 | 1.000  | -6.207 | 4.639  |
|                             |                |              | satisfied    | 2.284   | 2.317 | .974   | -3.276 | 7.845  |
|                             |                | neutral      | dissatisfied | .784    | 2.260 | 1.000  | -4.639 | 6.207  |
|                             |                | satisfied    | 3.068        | 2.329   | .565  | -2.522 | 8.658  |        |
|                             | single         | satisfied    | dissatisfied | -2.284  | 2.317 | .974   | -7.845 | 3.276  |
|                             |                |              | neutral      | -3.068  | 2.329 | .565   | -8.658 | 2.522  |
|                             |                | dissatisfied | neutral      | 1.212   | 1.183 | .919   | -1.629 | 4.052  |
|                             |                |              | satisfied    | 1.569   | 1.259 | .639   | -1.452 | 4.590  |
| neutral                     |                | dissatisfied | -1.212       | 1.183   | .919  | -4.052 | 1.629  |        |
| ASSIST_cannabis total score | with a partner |              | satisfied    | .357    | 1.281 | 1.000  | -2.716 | 3.431  |
|                             |                | satisfied    | dissatisfied | -1.569  | 1.259 | .639   | -4.590 | 1.452  |
|                             |                |              | neutral      | -.357   | 1.281 | 1.000  | -3.431 | 2.716  |
|                             |                | dissatisfied | neutral      | 2.040   | 1.223 | .287   | -.895  | 4.976  |
|                             |                |              | satisfied    | 1.337   | 1.254 | .860   | -1.673 | 4.347  |
|                             | single         | neutral      | dissatisfied | -2.040  | 1.223 | .287   | -4.976 | .895   |
|                             |                |              | satisfied    | -.703   | 1.261 | 1.000  | -3.729 | 2.323  |
|                             |                | satisfied    | dissatisfied | -1.337  | 1.254 | .860   | -4.347 | 1.673  |
|                             |                |              | neutral      | .703    | 1.261 | 1.000  | -2.323 | 3.729  |
|                             |                | dissatisfied | neutral      | 2.685*  | .756  | .001   | .871   | 4.499  |
| ASSIST_nicotine total score | with a partner |              | satisfied    | 2.684*  | .804  | .003   | .755   | 4.614  |
|                             |                | neutral      | dissatisfied | -2.685* | .756  | .001   | -4.499 | -.871  |
|                             |                |              | satisfied    | -.001   | .818  | 1.000  | -1.964 | 1.962  |
|                             |                | satisfied    | dissatisfied | -2.684* | .804  | .003   | -4.614 | -.755  |
|                             |                |              | neutral      | .001    | .818  | 1.000  | -1.962 | 1.964  |
|                             | single         | dissatisfied | neutral      | 2.912*  | .781  | .001   | 1.037  | 4.787  |
|                             |                |              | satisfied    | 1.707   | .801  | .100   | -.215  | 3.629  |
|                             |                | neutral      | dissatisfied | -2.912* | .781  | .001   | -4.787 | -1.037 |
|                             |                |              | satisfied    | -1.205  | .805  | .405   | -3.138 | .727   |
|                             |                | satisfied    | dissatisfied | -1.707  | .801  | .100   | -3.629 | .215   |
|                             | neutral        | 1.205        | .805         | .405    | -.727 | 3.138  |        |        |
| Field of study              |                |              |              |         |       |        |        |        |

|                 |                            |              |              |         |       |       |         |        |
|-----------------|----------------------------|--------------|--------------|---------|-------|-------|---------|--------|
| GHQ total score | Medicine & Pharmacy        | dissatisfied | neutral      | 1.876   | 1.364 | .509  | -1.399  | 5.150  |
|                 |                            |              | satisfied    | .406    | 1.478 | 1.000 | -3.141  | 3.954  |
|                 |                            | neutral      | dissatisfied | -1.876  | 1.364 | .509  | -5.150  | 1.399  |
|                 |                            |              | satisfied    | -1.469  | 1.462 | .945  | -4.977  | 2.038  |
|                 |                            | satisfied    | dissatisfied | -.406   | 1.478 | 1.000 | -3.954  | 3.141  |
|                 |                            |              | neutral      | 1.469   | 1.462 | .945  | -2.038  | 4.977  |
|                 | Engineering & Agricultural | dissatisfied | neutral      | .785    | 1.386 | 1.000 | -2.541  | 4.112  |
|                 |                            |              | satisfied    | .860    | 1.635 | 1.000 | -3.063  | 4.784  |
|                 |                            | neutral      | dissatisfied | -.785   | 1.386 | 1.000 | -4.112  | 2.541  |
|                 |                            |              | satisfied    | .075    | 1.666 | 1.000 | -3.924  | 4.074  |
|                 |                            | satisfied    | dissatisfied | -.860   | 1.635 | 1.000 | -4.784  | 3.063  |
|                 |                            |              | neutral      | -.075   | 1.666 | 1.000 | -4.074  | 3.924  |
|                 | Economics                  | dissatisfied | neutral      | 4.687*  | 1.503 | .006  | 1.080   | 8.295  |
|                 |                            |              | satisfied    | 2.969   | 1.553 | .169  | -.758   | 6.696  |
|                 |                            | neutral      | dissatisfied | -4.687* | 1.503 | .006  | -8.295  | -1.080 |
|                 |                            |              | satisfied    | -1.719  | 1.578 | .829  | -5.506  | 2.068  |
|                 |                            | satisfied    | dissatisfied | -2.969  | 1.553 | .169  | -6.696  | .758   |
|                 |                            |              | neutral      | 1.719   | 1.578 | .829  | -2.068  | 5.506  |
| USS total score | Law                        | dissatisfied | neutral      | 5.820   | 2.487 | .059  | -.149   | 11.790 |
|                 |                            |              | satisfied    | 5.768   | 2.528 | .069  | -.300   | 11.835 |
|                 |                            | neutral      | dissatisfied | -5.820  | 2.487 | .059  | -11.790 | .149   |
|                 |                            |              | satisfied    | -.053   | 2.421 | 1.000 | -5.863  | 5.758  |
|                 |                            | satisfied    | dissatisfied | -5.768  | 2.528 | .069  | -11.835 | .300   |
|                 |                            |              | neutral      | .053    | 2.421 | 1.000 | -5.758  | 5.863  |
|                 | Medicine & Pharmacy        | dissatisfied | neutral      | .919    | 1.788 | 1.000 | -3.373  | 5.211  |
|                 |                            |              | satisfied    | .614    | 1.937 | 1.000 | -4.036  | 5.264  |
|                 |                            | neutral      | dissatisfied | -.919   | 1.788 | 1.000 | -5.211  | 3.373  |
|                 |                            |              | satisfied    | -.305   | 1.916 | 1.000 | -4.903  | 4.293  |
|                 |                            | satisfied    | dissatisfied | -.614   | 1.937 | 1.000 | -5.264  | 4.036  |
|                 |                            |              | neutral      | .305    | 1.916 | 1.000 | -4.293  | 4.903  |
|                 | Engineering & Agricultural | dissatisfied | neutral      | 1.649   | 1.817 | 1.000 | -2.711  | 6.010  |
|                 |                            |              | satisfied    | 3.818   | 2.143 | .226  | -1.324  | 8.961  |
|                 |                            | neutral      | dissatisfied | -1.649  | 1.817 | 1.000 | -6.010  | 2.711  |

|                  |                            |              |              |         |       |       |         |        |
|------------------|----------------------------|--------------|--------------|---------|-------|-------|---------|--------|
| IAUQ total score | Economics                  | satisfied    | satisfied    | 2.169   | 2.184 | .963  | -3.073  | 7.411  |
|                  |                            |              | dissatisfied | -3.818  | 2.143 | .226  | -8.961  | 1.324  |
|                  |                            |              | neutral      | -2.169  | 2.184 | .963  | -7.411  | 3.073  |
|                  |                            | dissatisfied | neutral      | 5.480*  | 1.970 | .017  | .751    | 10.209 |
|                  |                            |              | satisfied    | 4.319   | 2.035 | .103  | -.566   | 9.204  |
|                  |                            |              | dissatisfied | -5.480* | 1.970 | .017  | -10.209 | -.751  |
|                  |                            | neutral      | satisfied    | -1.161  | 2.068 | 1.000 | -6.125  | 3.804  |
|                  |                            |              | dissatisfied | -4.319  | 2.035 | .103  | -9.204  | .566   |
|                  |                            |              | neutral      | 1.161   | 2.068 | 1.000 | -3.804  | 6.125  |
|                  | Law                        | dissatisfied | neutral      | 6.975   | 3.260 | .098  | -.850   | 14.800 |
|                  |                            |              | satisfied    | 8.045*  | 3.314 | .046  | .091    | 15.999 |
|                  |                            |              | dissatisfied | -6.975  | 3.260 | .098  | -14.800 | .850   |
|                  |                            | neutral      | satisfied    | 1.070   | 3.173 | 1.000 | -6.546  | 8.686  |
|                  |                            |              | dissatisfied | -8.045* | 3.314 | .046  | -15.999 | -.091  |
|                  |                            |              | neutral      | -1.070  | 3.173 | 1.000 | -8.686  | 6.546  |
|                  | Medicine & Pharmacy        | dissatisfied | neutral      | -1.407  | 2.239 | 1.000 | -6.782  | 3.967  |
|                  |                            |              | satisfied    | -1.852  | 2.426 | 1.000 | -7.675  | 3.970  |
|                  |                            | neutral      | dissatisfied | 1.407   | 2.239 | 1.000 | -3.967  | 6.782  |
|                  |                            |              | satisfied    | -.445   | 2.399 | 1.000 | -6.202  | 5.312  |
|                  |                            | satisfied    | dissatisfied | 1.852   | 2.426 | 1.000 | -3.970  | 7.675  |
|                  |                            |              | neutral      | .445    | 2.399 | 1.000 | -5.312  | 6.202  |
|                  | Engineering & Agricultural | dissatisfied | neutral      | -4.280  | 2.275 | .181  | -9.740  | 1.180  |
|                  |                            |              | satisfied    | -.900   | 2.683 | 1.000 | -7.339  | 5.540  |
|                  |                            | neutral      | dissatisfied | 4.280   | 2.275 | .181  | -1.180  | 9.740  |
|                  |                            |              | satisfied    | 3.380   | 2.735 | .651  | -3.184  | 9.944  |
|                  |                            | satisfied    | dissatisfied | .900    | 2.683 | 1.000 | -5.540  | 7.339  |
|                  |                            |              | neutral      | -3.380  | 2.735 | .651  | -9.944  | 3.184  |
|                  | Economics                  | dissatisfied | neutral      | -.075   | 2.467 | 1.000 | -5.996  | 5.847  |
|                  |                            |              | satisfied    | 1.790   | 2.549 | 1.000 | -4.327  | 7.908  |
|                  |                            | neutral      | dissatisfied | .075    | 2.467 | 1.000 | -5.847  | 5.996  |
|                  |                            |              | satisfied    | 1.865   | 2.590 | 1.000 | -4.351  | 8.081  |
|                  |                            | satisfied    | dissatisfied | -1.790  | 2.549 | 1.000 | -7.908  | 4.327  |
|                  |                            |              | neutral      | -1.865  | 2.590 | 1.000 | -8.081  | 4.351  |

|                             |                            |              |              |         |       |       |         |        |
|-----------------------------|----------------------------|--------------|--------------|---------|-------|-------|---------|--------|
| ASSIST_alcool total score   | Law                        | dissatisfied | neutral      | 3.529   | 4.083 | 1.000 | -6.269  | 13.328 |
|                             |                            |              | satisfied    | 6.273   | 4.150 | .393  | -3.687  | 16.233 |
|                             |                            | neutral      | dissatisfied | -3.529  | 4.083 | 1.000 | -13.328 | 6.269  |
|                             |                            |              | satisfied    | 2.744   | 3.974 | 1.000 | -6.793  | 12.280 |
|                             |                            | satisfied    | dissatisfied | -6.273  | 4.150 | .393  | -16.233 | 3.687  |
|                             |                            |              | neutral      | -2.744  | 3.974 | 1.000 | -12.280 | 6.793  |
|                             | Medicine & Pharmacy        | dissatisfied | neutral      | 2.142   | 1.212 | .233  | -.767   | 5.052  |
|                             |                            |              | satisfied    | 1.892   | 1.313 | .450  | -1.260  | 5.043  |
|                             |                            | neutral      | dissatisfied | -2.142  | 1.212 | .233  | -5.052  | .767   |
|                             |                            |              | satisfied    | -.251   | 1.298 | 1.000 | -3.367  | 2.866  |
|                             |                            | satisfied    | dissatisfied | -1.892  | 1.313 | .450  | -5.043  | 1.260  |
|                             |                            |              | neutral      | .251    | 1.298 | 1.000 | -2.866  | 3.367  |
|                             | Engineering & Agricultural | dissatisfied | neutral      | 1.254   | 1.231 | .926  | -1.701  | 4.210  |
|                             |                            |              | satisfied    | .047    | 1.452 | 1.000 | -3.439  | 3.532  |
|                             |                            | neutral      | dissatisfied | -1.254  | 1.231 | .926  | -4.210  | 1.701  |
|                             |                            |              | satisfied    | -1.207  | 1.480 | 1.000 | -4.760  | 2.345  |
|                             |                            | satisfied    | dissatisfied | -.047   | 1.452 | 1.000 | -3.532  | 3.439  |
|                             |                            |              | neutral      | 1.207   | 1.480 | 1.000 | -2.345  | 4.760  |
|                             | Economics                  | dissatisfied | neutral      | 1.582   | 1.335 | .710  | -1.623  | 4.787  |
|                             |                            |              | satisfied    | 1.574   | 1.380 | .763  | -1.737  | 4.885  |
|                             |                            | neutral      | dissatisfied | -1.582  | 1.335 | .710  | -4.787  | 1.623  |
|                             |                            |              | satisfied    | -.008   | 1.402 | 1.000 | -3.373  | 3.356  |
|                             |                            | satisfied    | dissatisfied | -1.574  | 1.380 | .763  | -4.885  | 1.737  |
|                             |                            |              | neutral      | .008    | 1.402 | 1.000 | -3.356  | 3.373  |
|                             | Law                        | dissatisfied | neutral      | 1.525   | 2.210 | 1.000 | -3.778  | 6.829  |
|                             |                            |              | satisfied    | 2.300   | 2.246 | .919  | -3.091  | 7.691  |
|                             |                            | neutral      | dissatisfied | -1.525  | 2.210 | 1.000 | -6.829  | 3.778  |
|                             |                            |              | satisfied    | .775    | 2.151 | 1.000 | -4.387  | 5.937  |
|                             |                            | satisfied    | dissatisfied | -2.300  | 2.246 | .919  | -7.691  | 3.091  |
|                             |                            |              | neutral      | -.775   | 2.151 | 1.000 | -5.937  | 4.387  |
| ASSIST_cannabis total score | Medicine & Pharmacy        | dissatisfied | neutral      | 3.280*  | .774  | .000  | 1.422   | 5.138  |
|                             |                            |              | satisfied    | 3.367*  | .839  | .000  | 1.354   | 5.380  |
|                             |                            | neutral      | dissatisfied | -3.280* | .774  | .000  | -5.138  | -1.422 |



|                   |                            |              |              |              |         |        |        |        |       |
|-------------------|----------------------------|--------------|--------------|--------------|---------|--------|--------|--------|-------|
| GHQ total score   | Engineering & Agricultural |              | satisfied    | .086         | .829    | 1.000  | -1.904 | 2.077  |       |
|                   |                            | satisfied    | dissatisfied | -3.367*      | .839    | .000   | -5.380 | -1.354 |       |
|                   |                            |              | neutral      | -.086        | .829    | 1.000  | -2.077 | 1.904  |       |
|                   |                            | dissatisfied | neutral      | 2.153*       | .786    | .019   | .266   | 4.041  |       |
|                   |                            |              | satisfied    | .793         | .928    | 1.000  | -1.433 | 3.019  |       |
|                   |                            |              | neutral      | dissatisfied | -2.153* | .786   | .019   | -4.041 | -.266 |
|                   |                            |              |              | satisfied    | -1.361  | .945   | .452   | -3.630 | .909  |
|                   |                            | satisfied    | dissatisfied | -.793        | .928    | 1.000  | -3.019 | 1.433  |       |
|                   |                            |              | neutral      | 1.361        | .945    | .452   | -.909  | 3.630  |       |
|                   | Economics                  | dissatisfied | neutral      | 2.750*       | .853    | .004   | .703   | 4.797  |       |
|                   |                            |              | satisfied    | 2.736*       | .881    | .006   | .622   | 4.851  |       |
|                   |                            | neutral      | dissatisfied | -2.750*      | .853    | .004   | -4.797 | -.703  |       |
|                   |                            |              | satisfied    | -.014        | .895    | 1.000  | -2.163 | 2.135  |       |
|                   |                            | satisfied    | dissatisfied | -2.736*      | .881    | .006   | -4.851 | -.622  |       |
|                   |                            |              | neutral      | .014         | .895    | 1.000  | -2.135 | 2.163  |       |
|                   | Law                        | dissatisfied | neutral      | 3.011        | 1.411   | .100   | -.377  | 6.398  |       |
|                   |                            |              | satisfied    | 1.887        | 1.435   | .567   | -1.556 | 5.330  |       |
|                   |                            | neutral      | dissatisfied | -3.011       | 1.411   | .100   | -6.398 | .377   |       |
|                   |                            |              | satisfied    | -1.124       | 1.374   | 1.000  | -4.421 | 2.173  |       |
|                   |                            | satisfied    | dissatisfied | -1.887       | 1.435   | .567   | -5.330 | 1.556  |       |
|                   |                            |              | neutral      | 1.124        | 1.374   | 1.000  | -2.173 | 4.421  |       |
| Employment status |                            |              |              |              |         |        |        |        |       |
| Student worker    | dissatisfied               | neutral      | 3.224        | 1.382        | .060    | -.093  | 6.541  |        |       |
|                   |                            | satisfied    | 1.839        | 1.463        | .628    | -1.673 | 5.350  |        |       |
|                   |                            | neutral      | dissatisfied | -3.224       | 1.382   | .060   | -6.541 | .093   |       |
|                   |                            |              | satisfied    | -1.385       | 1.501   | 1.000  | -4.987 | 2.216  |       |
|                   |                            | satisfied    | dissatisfied | -1.839       | 1.463   | .628   | -5.350 | 1.673  |       |
|                   |                            |              | neutral      | 1.385        | 1.501   | 1.000  | -2.216 | 4.987  |       |
|                   | Student                    | dissatisfied | neutral      | 3.360*       | 1.340   | .037   | .144   | 6.577  |       |
|                   |                            |              | satisfied    | 3.163        | 1.399   | .072   | -.195  | 6.520  |       |
|                   |                            | neutral      | dissatisfied | -3.360*      | 1.340   | .037   | -6.577 | -.144  |       |
|                   |                            |              | satisfied    | -.198        | 1.408   | 1.000  | -3.578 | 3.182  |       |
|                   |                            | satisfied    | dissatisfied | -3.163       | 1.399   | .072   | -6.520 | .195   |       |

|                           |                |              |              |         |       |       |         |        |
|---------------------------|----------------|--------------|--------------|---------|-------|-------|---------|--------|
| USS total score           | Student worker | dissatisfied | neutral      | .198    | 1.408 | 1.000 | -3.182  | 3.578  |
|                           |                |              | satisfied    | 1.799   | 1.812 | .963  | -2.549  | 6.147  |
|                           |                | neutral      | dissatisfied | 1.804   | 1.918 | 1.000 | -2.799  | 6.406  |
|                           |                |              | satisfied    | -1.799  | 1.812 | .963  | -6.147  | 2.549  |
|                           |                | satisfied    | dissatisfied | .005    | 1.967 | 1.000 | -4.716  | 4.725  |
|                           |                |              | neutral      | -1.804  | 1.918 | 1.000 | -6.406  | 2.799  |
|                           | Student        | dissatisfied | dissatisfied | -.005   | 1.967 | 1.000 | -4.725  | 4.716  |
|                           |                |              | satisfied    | 5.712*  | 1.757 | .004  | 1.496   | 9.928  |
|                           |                | neutral      | dissatisfied | 6.594*  | 1.834 | .001  | 2.194   | 10.995 |
|                           |                |              | satisfied    | -5.712* | 1.757 | .004  | -9.928  | -1.496 |
|                           |                | satisfied    | dissatisfied | .882    | 1.846 | 1.000 | -3.548  | 5.313  |
|                           |                |              | neutral      | -6.594* | 1.834 | .001  | -10.995 | -2.194 |
| IAUQ total score          | Student worker | dissatisfied | dissatisfied | -.882   | 1.846 | 1.000 | -5.313  | 3.548  |
|                           |                |              | satisfied    | -2.388  | 2.269 | .879  | -7.833  | 3.056  |
|                           |                | neutral      | dissatisfied | -.725   | 2.401 | 1.000 | -6.488  | 5.038  |
|                           |                |              | satisfied    | 2.388   | 2.269 | .879  | -3.056  | 7.833  |
|                           |                | satisfied    | dissatisfied | 1.663   | 2.463 | 1.000 | -4.248  | 7.574  |
|                           |                |              | neutral      | .725    | 2.401 | 1.000 | -5.038  | 6.488  |
|                           | Student        | dissatisfied | dissatisfied | -1.663  | 2.463 | 1.000 | -7.574  | 4.248  |
|                           |                |              | satisfied    | 1.272   | 2.200 | 1.000 | -4.007  | 6.551  |
|                           |                | neutral      | dissatisfied | 3.381   | 2.296 | .424  | -2.130  | 8.891  |
|                           |                |              | satisfied    | -1.272  | 2.200 | 1.000 | -6.551  | 4.007  |
|                           |                | satisfied    | dissatisfied | 2.109   | 2.312 | 1.000 | -3.439  | 7.657  |
|                           |                |              | neutral      | -3.381  | 2.296 | .424  | -8.891  | 2.130  |
| ASSIST_alcool total score | Student worker | dissatisfied | dissatisfied | -2.109  | 2.312 | 1.000 | -7.657  | 3.439  |
|                           |                |              | satisfied    | .903    | 1.228 | 1.000 | -2.043  | 3.850  |
|                           |                | neutral      | dissatisfied | 1.524   | 1.300 | .725  | -1.596  | 4.643  |
|                           |                |              | satisfied    | -.903   | 1.228 | 1.000 | -3.850  | 2.043  |
|                           |                | satisfied    | dissatisfied | .620    | 1.333 | 1.000 | -2.579  | 3.820  |
|                           |                |              | neutral      | -1.524  | 1.300 | .725  | -4.643  | 1.596  |
|                           | Student        | dissatisfied | dissatisfied | -.620   | 1.333 | 1.000 | -3.820  | 2.579  |
|                           |                |              | satisfied    | 2.349   | 1.191 | .147  | -.509   | 5.206  |
|                           |                | satisfied    | dissatisfied | 1.383   | 1.243 | .799  | -1.600  | 4.365  |
|                           |                |              | satisfied    |         |       |       |         |        |

|                             |                                |              |              |         |       |       |        |        |
|-----------------------------|--------------------------------|--------------|--------------|---------|-------|-------|--------|--------|
| ASSIST_cannabis total score |                                | neutral      | dissatisfied | -2.349  | 1.191 | .147  | -5.206 | .509   |
|                             |                                |              | satisfied    | -.966   | 1.251 | 1.000 | -3.969 | 2.037  |
|                             |                                | satisfied    | dissatisfied | -1.383  | 1.243 | .799  | -4.365 | 1.600  |
|                             |                                |              | neutral      | .966    | 1.251 | 1.000 | -2.037 | 3.969  |
|                             | Student worker                 | dissatisfied | neutral      | 2.969*  | .784  | .001  | 1.086  | 4.851  |
|                             |                                |              | satisfied    | 2.557*  | .830  | .006  | .565   | 4.550  |
|                             |                                | neutral      | dissatisfied | -2.969* | .784  | .001  | -4.851 | -1.086 |
|                             |                                |              | satisfied    | -.411   | .851  | 1.000 | -2.455 | 1.632  |
|                             |                                | satisfied    | dissatisfied | -2.557* | .830  | .006  | -4.550 | -.565  |
|                             |                                |              | neutral      | .411    | .851  | 1.000 | -1.632 | 2.455  |
|                             | Student                        | dissatisfied | neutral      | 2.629*  | .760  | .002  | .804   | 4.454  |
|                             |                                |              | satisfied    | 1.834   | .794  | .063  | -.071  | 3.739  |
|                             |                                | neutral      | dissatisfied | -2.629* | .760  | .002  | -4.454 | -.804  |
|                             |                                |              | satisfied    | -.795   | .799  | .961  | -2.712 | 1.123  |
|                             |                                | satisfied    | dissatisfied | -1.834  | .794  | .063  | -3.739 | .071   |
|                             |                                |              | neutral      | .795    | .799  | .961  | -1.123 | 2.712  |
|                             | Lifetime psychological support |              |              |         |       |       |        |        |
| GHQ total score             | yes                            | dissatisfied | neutral      | 3.254   | 1.374 | .055  | -.045  | 6.552  |
|                             |                                |              | satisfied    | 1.810   | 1.403 | .592  | -1.557 | 5.177  |
|                             |                                | neutral      | dissatisfied | -3.254  | 1.374 | .055  | -6.552 | .045   |
|                             |                                |              | satisfied    | -1.444  | 1.389 | .897  | -4.776 | 1.889  |
|                             |                                | satisfied    | dissatisfied | -1.810  | 1.403 | .592  | -5.177 | 1.557  |
|                             |                                |              | neutral      | 1.444   | 1.389 | .897  | -1.889 | 4.776  |
|                             | no                             | dissatisfied | neutral      | 3.330   | 1.424 | .059  | -.086  | 6.747  |
|                             |                                |              | satisfied    | 3.191   | 1.497 | .100  | -.401  | 6.784  |
|                             |                                | neutral      | dissatisfied | -3.330  | 1.424 | .059  | -6.747 | .086   |
|                             |                                |              | satisfied    | -.139   | 1.552 | 1.000 | -3.865 | 3.586  |
|                             |                                | satisfied    | dissatisfied | -3.191  | 1.497 | .100  | -6.784 | .401   |
|                             |                                |              | neutral      | .139    | 1.552 | 1.000 | -3.586 | 3.865  |
| USS total score             | yes                            | dissatisfied | neutral      | 3.919   | 1.801 | .090  | -.404  | 8.243  |
|                             |                                |              | satisfied    | 3.912   | 1.839 | .101  | -.501  | 8.326  |

|                           |     |              |              |        |       |       |        |       |
|---------------------------|-----|--------------|--------------|--------|-------|-------|--------|-------|
| IAUQ total score          | no  | neutral      | dissatisfied | -3.919 | 1.801 | .090  | -8.243 | .404  |
|                           |     |              | satisfied    | -.007  | 1.820 | 1.000 | -4.375 | 4.362 |
|                           |     | satisfied    | dissatisfied | -3.912 | 1.839 | .101  | -8.326 | .501  |
|                           |     |              | neutral      | .007   | 1.820 | 1.000 | -4.362 | 4.375 |
|                           |     | dissatisfied | neutral      | 3.593  | 1.866 | .164  | -.886  | 8.071 |
|                           |     |              | satisfied    | 4.486  | 1.962 | .068  | -.223  | 9.195 |
|                           | yes | neutral      | dissatisfied | -3.593 | 1.866 | .164  | -8.071 | .886  |
|                           |     |              | satisfied    | .894   | 2.035 | 1.000 | -3.990 | 5.777 |
|                           |     | satisfied    | dissatisfied | -4.486 | 1.962 | .068  | -9.195 | .223  |
|                           |     |              | neutral      | -.894  | 2.035 | 1.000 | -5.777 | 3.990 |
|                           |     | dissatisfied | neutral      | -.621  | 2.256 | 1.000 | -6.034 | 4.793 |
|                           |     |              | satisfied    | 1.234  | 2.303 | 1.000 | -4.292 | 6.761 |
| ASSIST_alcool total score | yes | neutral      | dissatisfied | .621   | 2.256 | 1.000 | -4.793 | 6.034 |
|                           |     |              | satisfied    | 1.855  | 2.279 | 1.000 | -3.615 | 7.325 |
|                           |     | satisfied    | dissatisfied | -1.234 | 2.303 | 1.000 | -6.761 | 4.292 |
|                           |     |              | neutral      | -1.855 | 2.279 | 1.000 | -7.325 | 3.615 |
|                           | no  | dissatisfied | neutral      | -.496  | 2.337 | 1.000 | -6.103 | 5.112 |
|                           |     |              | satisfied    | 1.421  | 2.457 | 1.000 | -4.475 | 7.318 |
|                           |     | neutral      | dissatisfied | .496   | 2.337 | 1.000 | -5.112 | 6.103 |
|                           |     |              | satisfied    | 1.917  | 2.548 | 1.000 | -4.198 | 8.032 |
|                           |     | satisfied    | dissatisfied | -1.421 | 2.457 | 1.000 | -7.318 | 4.475 |
|                           |     |              | neutral      | -1.917 | 2.548 | 1.000 | -8.032 | 4.198 |
| ASSIST_alcool total score | yes | dissatisfied | neutral      | 1.567  | 1.221 | .599  | -1.363 | 4.498 |
|                           |     |              | satisfied    | 1.011  | 1.246 | 1.000 | -1.980 | 4.003 |
|                           |     | neutral      | dissatisfied | -1.567 | 1.221 | .599  | -4.498 | 1.363 |
|                           |     |              | satisfied    | -.556  | 1.234 | 1.000 | -3.517 | 2.405 |
|                           |     | satisfied    | dissatisfied | -1.011 | 1.246 | 1.000 | -4.003 | 1.980 |
|                           |     |              | neutral      | .556   | 1.234 | 1.000 | -2.405 | 3.517 |
|                           | no  | dissatisfied | neutral      | 1.685  | 1.265 | .550  | -1.351 | 4.720 |
|                           |     |              | satisfied    | 1.895  | 1.330 | .464  | -1.297 | 5.086 |
|                           |     | neutral      | dissatisfied | -1.685 | 1.265 | .550  | -4.720 | 1.351 |
|                           |     |              | satisfied    | .210   | 1.379 | 1.000 | -3.100 | 3.520 |
|                           |     | satisfied    | dissatisfied | -1.895 | 1.330 | .464  | -5.086 | 1.297 |
|                           |     |              |              |        |       |       |        |       |

|                                       |     |              |              |         |       |       |         |        |
|---------------------------------------|-----|--------------|--------------|---------|-------|-------|---------|--------|
|                                       |     |              | neutral      | -2.210  | 1.379 | 1.000 | -3.520  | 3.100  |
| ASSIST_cannabis total score           | yes | dissatisfied | neutral      | 2.524*  | .780  | .004  | .652    | 4.395  |
|                                       |     |              | satisfied    | 1.647   | .796  | .117  | -.263   | 3.558  |
|                                       |     | neutral      | dissatisfied | -2.524* | .780  | .004  | -4.395  | -.652  |
|                                       |     |              | satisfied    | -.877   | .788  | .799  | -2.768  | 1.014  |
|                                       |     | satisfied    | dissatisfied | -1.647  | .796  | .117  | -3.558  | .263   |
|                                       | no  | dissatisfied | neutral      | .877    | .788  | .799  | -1.014  | 2.768  |
|                                       |     |              | satisfied    | 3.073*  | .808  | .000  | 1.135   | 5.012  |
|                                       |     | neutral      | dissatisfied | 2.744*  | .849  | .004  | .706    | 4.783  |
|                                       |     |              | satisfied    | -3.073* | .808  | .000  | -5.012  | -1.135 |
|                                       |     | satisfied    | dissatisfied | -.329   | .881  | 1.000 | -2.443  | 1.785  |
|                                       |     |              | neutral      | -2.744* | .849  | .004  | -4.783  | -.706  |
|                                       |     |              | satisfied    | .329    | .881  | 1.000 | -1.785  | 2.443  |
| Lifetime diagnosis of mental disorder |     |              |              |         |       |       |         |        |
| GHQ total score                       | yes | dissatisfied | neutral      | 4.204   | 2.276 | .195  | -1.257  | 9.666  |
|                                       |     |              | satisfied    | 4.178   | 2.387 | .242  | -1.551  | 9.908  |
|                                       |     | neutral      | dissatisfied | -4.204  | 2.276 | .195  | -9.666  | 1.257  |
|                                       |     |              | satisfied    | -.026   | 2.445 | 1.000 | -5.893  | 5.841  |
|                                       |     | satisfied    | dissatisfied | -4.178  | 2.387 | .242  | -9.908  | 1.551  |
|                                       | no  | dissatisfied | neutral      | .026    | 2.445 | 1.000 | -5.841  | 5.893  |
|                                       |     |              | satisfied    | 2.380*  | .868  | .019  | .297    | 4.463  |
|                                       |     | neutral      | dissatisfied | .823    | .885  | 1.000 | -1.301  | 2.947  |
|                                       |     |              | satisfied    | -2.380* | .868  | .019  | -4.463  | -.297  |
|                                       |     | satisfied    | dissatisfied | -1.557  | .856  | .209  | -3.612  | .499   |
|                                       |     |              | neutral      | -.823   | .885  | 1.000 | -2.947  | 1.301  |
|                                       |     |              | satisfied    | 1.557   | .856  | .209  | -.499   | 3.612  |
| USS total score                       | yes | dissatisfied | neutral      | 2.710   | 2.983 | 1.000 | -4.449  | 9.869  |
|                                       |     |              | satisfied    | 6.153   | 3.129 | .149  | -1.357  | 13.664 |
|                                       |     | neutral      | dissatisfied | -2.710  | 2.983 | 1.000 | -9.869  | 4.449  |
|                                       |     |              | satisfied    | 3.443   | 3.204 | .849  | -4.247  | 11.133 |
|                                       |     | satisfied    | dissatisfied | -6.153  | 3.129 | .149  | -13.664 | 1.357  |
|                                       |     |              | neutral      | -3.443  | 3.204 | .849  | -11.133 | 4.247  |

|                             |     |              |              |         |       |       |         |        |
|-----------------------------|-----|--------------|--------------|---------|-------|-------|---------|--------|
| IAUQ total score            | no  | dissatisfied | neutral      | 4.801*  | 1.138 | .000  | 2.071   | 7.531  |
|                             |     |              | satisfied    | 2.245   | 1.160 | .160  | -.539   | 5.030  |
|                             |     | neutral      | dissatisfied | -4.801* | 1.138 | .000  | -7.531  | -2.071 |
|                             |     |              | satisfied    | -2.556  | 1.123 | .069  | -5.250  | .138   |
|                             |     | satisfied    | dissatisfied | -2.245  | 1.160 | .160  | -5.030  | .539   |
|                             |     |              | neutral      | 2.556   | 1.123 | .069  | -.138   | 5.250  |
|                             | yes | dissatisfied | neutral      | -4.480  | 3.735 | .692  | -13.444 | 4.484  |
|                             |     |              | satisfied    | 1.342   | 3.918 | 1.000 | -8.062  | 10.746 |
|                             |     | neutral      | dissatisfied | 4.480   | 3.735 | .692  | -4.484  | 13.444 |
|                             |     |              | satisfied    | 5.822   | 4.012 | .442  | -3.808  | 15.451 |
|                             |     | satisfied    | dissatisfied | -1.342  | 3.918 | 1.000 | -10.746 | 8.062  |
|                             |     |              | neutral      | -5.822  | 4.012 | .442  | -15.451 | 3.808  |
| ASSIST_alcool total score   | no  | dissatisfied | neutral      | 3.364   | 1.424 | .055  | -.055   | 6.782  |
|                             |     |              | satisfied    | 1.314   | 1.453 | 1.000 | -2.173  | 4.801  |
|                             |     | neutral      | dissatisfied | -3.364  | 1.424 | .055  | -6.782  | .055   |
|                             |     |              | satisfied    | -2.050  | 1.406 | .436  | -5.423  | 1.324  |
|                             |     | satisfied    | dissatisfied | -1.314  | 1.453 | 1.000 | -4.801  | 2.173  |
|                             |     |              | neutral      | 2.050   | 1.406 | .436  | -1.324  | 5.423  |
|                             | yes | dissatisfied | neutral      | 3.884   | 2.022 | .165  | -.968   | 8.736  |
|                             |     |              | satisfied    | 2.474   | 2.121 | .732  | -2.617  | 7.564  |
|                             |     | neutral      | dissatisfied | -3.884  | 2.022 | .165  | -8.736  | .968   |
|                             |     |              | satisfied    | -1.411  | 2.172 | 1.000 | -6.623  | 3.801  |
|                             |     | satisfied    | dissatisfied | -2.474  | 2.121 | .732  | -7.564  | 2.617  |
|                             |     |              | neutral      | 1.411   | 2.172 | 1.000 | -3.801  | 6.623  |
| ASSIST_cannabis total score | no  | dissatisfied | neutral      | -.632   | .771  | 1.000 | -2.483  | 1.218  |
|                             |     |              | satisfied    | .433    | .786  | 1.000 | -1.455  | 2.320  |
|                             |     | neutral      | dissatisfied | .632    | .771  | 1.000 | -1.218  | 2.483  |
|                             |     |              | satisfied    | 1.065   | .761  | .486  | -.761   | 2.891  |
|                             |     | satisfied    | dissatisfied | -.433   | .786  | 1.000 | -2.320  | 1.455  |
|                             |     |              | neutral      | -1.065  | .761  | .486  | -2.891  | .761   |
|                             | yes | dissatisfied | neutral      | 5.109*  | 1.291 | .000  | 2.011   | 8.208  |
|                             |     |              | satisfied    | 4.477*  | 1.355 | .003  | 1.226   | 7.728  |
|                             |     | neutral      | dissatisfied | -5.109* | 1.291 | .000  | -8.208  | -2.011 |

|                        |                                      |                |              |              |         |       |        |        |       |
|------------------------|--------------------------------------|----------------|--------------|--------------|---------|-------|--------|--------|-------|
| GHQ total score        | no                                   |                | satisfied    | -.632        | 1.387   | 1.000 | -3.961 | 2.697  |       |
|                        |                                      | satisfied      | dissatisfied | -4.477*      | 1.355   | .003  | -7.728 | -1.226 |       |
|                        |                                      |                | neutral      | .632         | 1.387   | 1.000 | -2.697 | 3.961  |       |
|                        |                                      | dissatisfied   | neutral      | .488         | .492    | .967  | -.694  | 1.670  |       |
|                        |                                      |                | satisfied    | -.086        | .502    | 1.000 | -1.291 | 1.120  |       |
|                        |                                      | neutral        | dissatisfied | -.488        | .492    | .967  | -1.670 | .694   |       |
|                        |                                      |                | satisfied    | -.573        | .486    | .715  | -1.740 | .593   |       |
|                        |                                      | satisfied      | dissatisfied | .086         | .502    | 1.000 | -1.120 | 1.291  |       |
|                        | neutral                              |                | .573         | .486         | .715    | -.593 | 1.740  |        |       |
|                        | Intention to dropout from university |                |              |              |         |       |        |        |       |
|                        | USS total score                      | low intentions | dissatisfied | neutral      | 3.308*  | 1.265 | .027   | .272   | 6.344 |
|                        |                                      |                |              | satisfied    | 2.164   | 1.337 | .318   | -1.044 | 5.372 |
|                        |                                      |                | neutral      | dissatisfied | -3.308* | 1.265 | .027   | -6.344 | -.272 |
|                        |                                      |                |              | satisfied    | -1.144  | 1.339 | 1.000  | -4.358 | 2.070 |
| medium/high intentions |                                      | satisfied      | dissatisfied | -2.164       | 1.337   | .318  | -5.372 | 1.044  |       |
|                        |                                      |                | neutral      | 1.144        | 1.339   | 1.000 | -2.070 | 4.358  |       |
|                        |                                      | dissatisfied   | neutral      | 3.276        | 1.487   | .084  | -.292  | 6.844  |       |
|                        |                                      |                | satisfied    | 2.837        | 1.511   | .183  | -.790  | 6.464  |       |
|                        |                                      | neutral        | dissatisfied | -3.276       | 1.487   | .084  | -6.844 | .292   |       |
|                        |                                      |                | satisfied    | -.439        | 1.575   | 1.000 | -4.219 | 3.341  |       |
|                        |                                      | satisfied      | dissatisfied | -2.837       | 1.511   | .183  | -6.464 | .790   |       |
|                        |                                      |                | neutral      | .439         | 1.575   | 1.000 | -3.341 | 4.219  |       |

|                             |                        |              |              |         |       |       |         |        |
|-----------------------------|------------------------|--------------|--------------|---------|-------|-------|---------|--------|
| IAUQ total score            | low intentions         | satisfied    | dissatisfied | -7.512* | 1.981 | .000  | -12.265 | -2.758 |
|                             |                        |              | neutral      | -2.411  | 2.065 | .730  | -7.366  | 2.544  |
|                             |                        | dissatisfied | neutral      | -1.223  | 2.076 | 1.000 | -6.205  | 3.760  |
|                             |                        |              | satisfied    | .620    | 2.194 | 1.000 | -4.646  | 5.885  |
|                             | medium/high intentions | neutral      | dissatisfied | 1.223   | 2.076 | 1.000 | -3.760  | 6.205  |
|                             |                        |              | satisfied    | 1.842   | 2.198 | 1.000 | -3.433  | 7.117  |
|                             |                        | satisfied    | dissatisfied | -.620   | 2.194 | 1.000 | -5.885  | 4.646  |
|                             |                        |              | neutral      | -1.842  | 2.198 | 1.000 | -7.117  | 3.433  |
|                             |                        | dissatisfied | neutral      | .106    | 2.440 | 1.000 | -5.750  | 5.963  |
|                             |                        |              | satisfied    | 2.036   | 2.480 | 1.000 | -3.917  | 7.989  |
|                             |                        | neutral      | dissatisfied | -.106   | 2.440 | 1.000 | -5.963  | 5.750  |
|                             |                        |              | satisfied    | 1.930   | 2.585 | 1.000 | -4.275  | 8.134  |
| ASSIST_alcohol total score  | low intentions         | satisfied    | dissatisfied | -2.036  | 2.480 | 1.000 | -7.989  | 3.917  |
|                             |                        |              | neutral      | -1.930  | 2.585 | 1.000 | -8.134  | 4.275  |
|                             |                        | dissatisfied | neutral      | 1.809   | 1.124 | .324  | -.888   | 4.506  |
|                             |                        |              | satisfied    | 1.446   | 1.188 | .671  | -1.404  | 4.296  |
|                             | medium/high intentions | neutral      | dissatisfied | -1.809  | 1.124 | .324  | -4.506  | .888   |
|                             |                        |              | satisfied    | -.363   | 1.190 | 1.000 | -3.218  | 2.492  |
|                             |                        | satisfied    | dissatisfied | -1.446  | 1.188 | .671  | -4.296  | 1.404  |
|                             |                        |              | neutral      | .363    | 1.190 | 1.000 | -2.492  | 3.218  |
|                             |                        | dissatisfied | neutral      | 1.443   | 1.321 | .825  | -1.727  | 4.613  |
|                             |                        |              | satisfied    | 1.460   | 1.343 | .832  | -1.762  | 4.682  |
|                             |                        | neutral      | dissatisfied | -1.443  | 1.321 | .825  | -4.613  | 1.727  |
|                             |                        |              | satisfied    | .017    | 1.399 | 1.000 | -3.341  | 3.375  |
| ASSIST_cannabis total score | low intentions         | satisfied    | dissatisfied | -1.460  | 1.343 | .832  | -4.682  | 1.762  |
|                             |                        |              | neutral      | -.017   | 1.399 | 1.000 | -3.375  | 3.341  |
|                             |                        | dissatisfied | neutral      | 2.458*  | .718  | .002  | .736    | 4.181  |
|                             |                        |              | satisfied    | 1.921*  | .758  | .035  | .101    | 3.742  |
|                             | medium/high            | neutral      | dissatisfied | -2.458* | .718  | .002  | -4.181  | -.736  |
|                             |                        |              | satisfied    | -.537   | .760  | 1.000 | -2.360  | 1.287  |
|                             |                        | satisfied    | dissatisfied | -1.921* | .758  | .035  | -3.742  | -.101  |
|                             |                        |              | neutral      | .537    | .760  | 1.000 | -1.287  | 2.360  |
|                             | medium/high            | dissatisfied | neutral      | 3.139*  | .844  | .001  | 1.114   | 5.164  |
|                             |                        |              |              |         |       |       |         |        |



|            |           |              |         |      |       |        |        |
|------------|-----------|--------------|---------|------|-------|--------|--------|
| intentions |           | satisfied    | 2.470*  | .857 | .012  | .412   | 4.528  |
|            | neutral   | dissatisfied | -3.139* | .844 | .001  | -5.164 | -1.114 |
|            |           | satisfied    | -.669   | .894 | 1.000 | -2.814 | 1.476  |
|            | satisfied | dissatisfied | -2.470* | .857 | .012  | -4.528 | -.412  |
|            |           | neutral      | .669    | .894 | 1.000 | -1.476 | 2.814  |
|            |           |              |         |      |       |        |        |

Based on estimated marginal means

\*. The mean difference is significant at the .05 level.

<sup>1</sup>. Adjustment for multiple comparisons: Bonferroni.
